# Supplementary material for: Photoactivity of Titanium Dioxide Foams
Source: Hindawi journal article supplement (doi:10.1155/2018/5057814), 2018-01-01
Supplement: f1 [file 5057814.f1.pdf]

## Supplementary 1.

Fig. S1 a. SEM photographs of TiO<sub>2</sub>-P25 (Evonik AEROXIDE® P25) with different magnifications

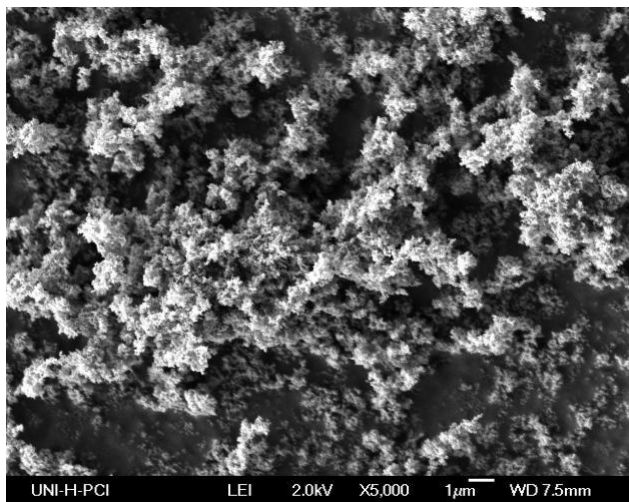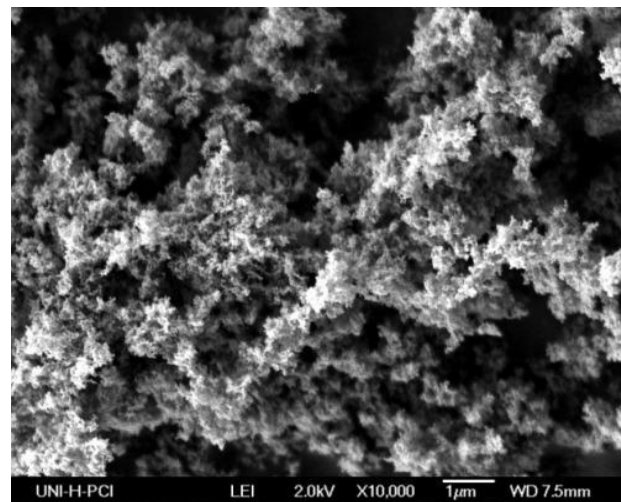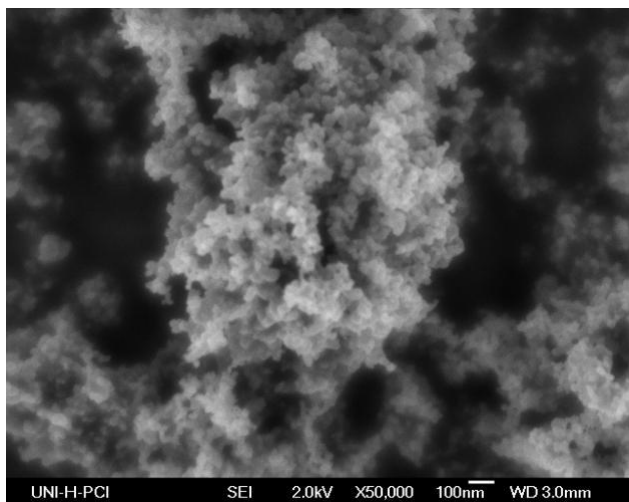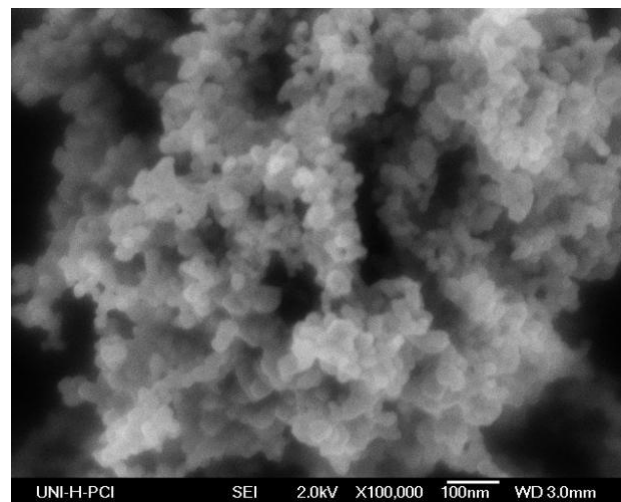

Fig. S1 b. SEM photographs of  $\text{TiO}_2$ -Foam-1 (hexylic acid as amphiphilic molecule) with different magnifications

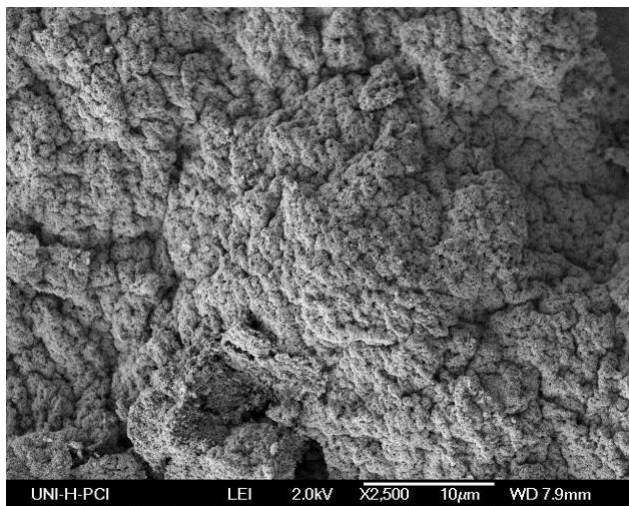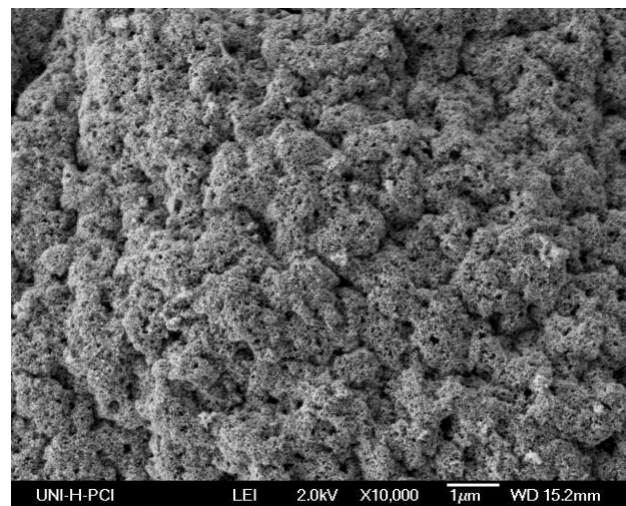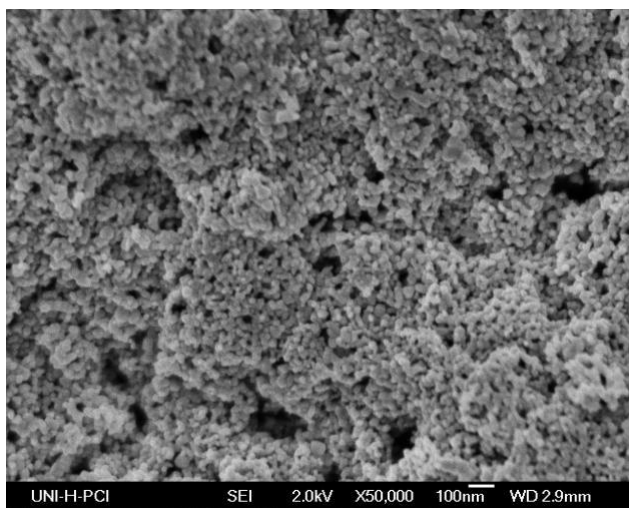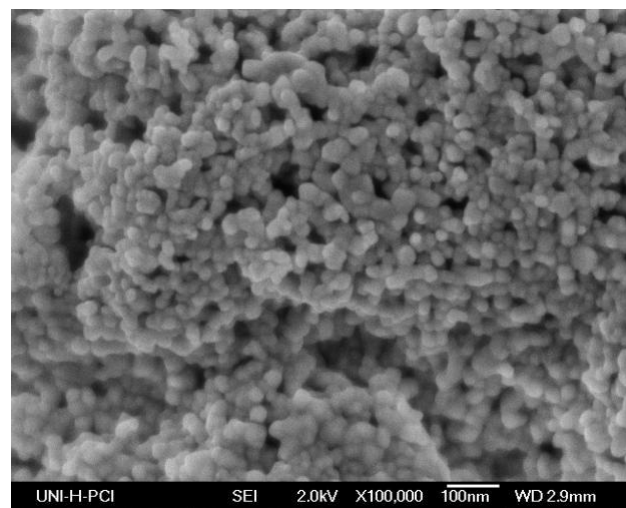

Fig. S1 c. SEM photographs of  $\text{TiO}_2$ -Foam-2 (hexylamine as amphiphilic molecule) with different magnifications

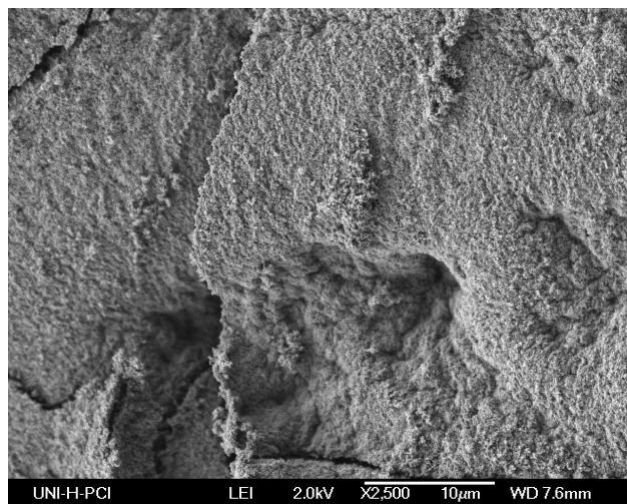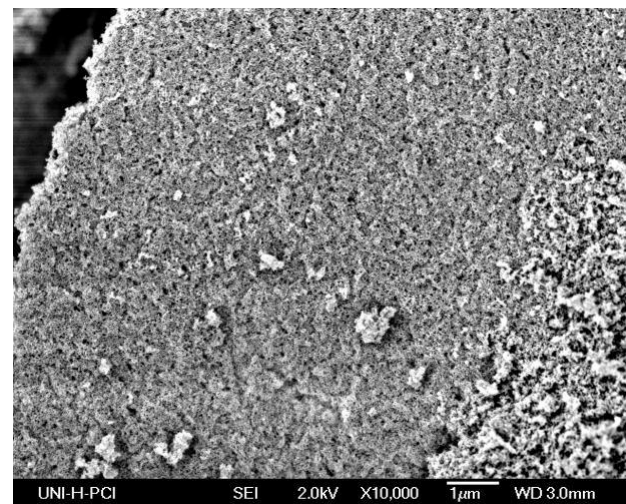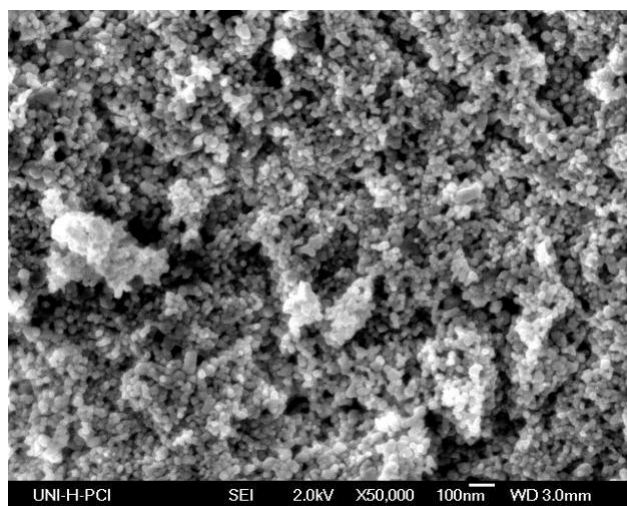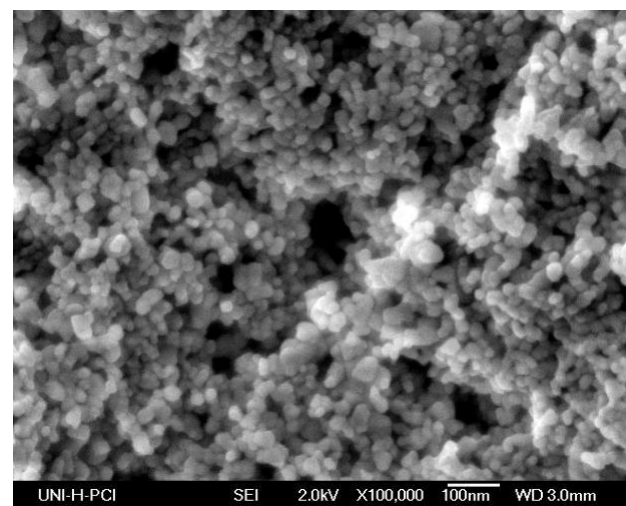

## Supplementary 2.

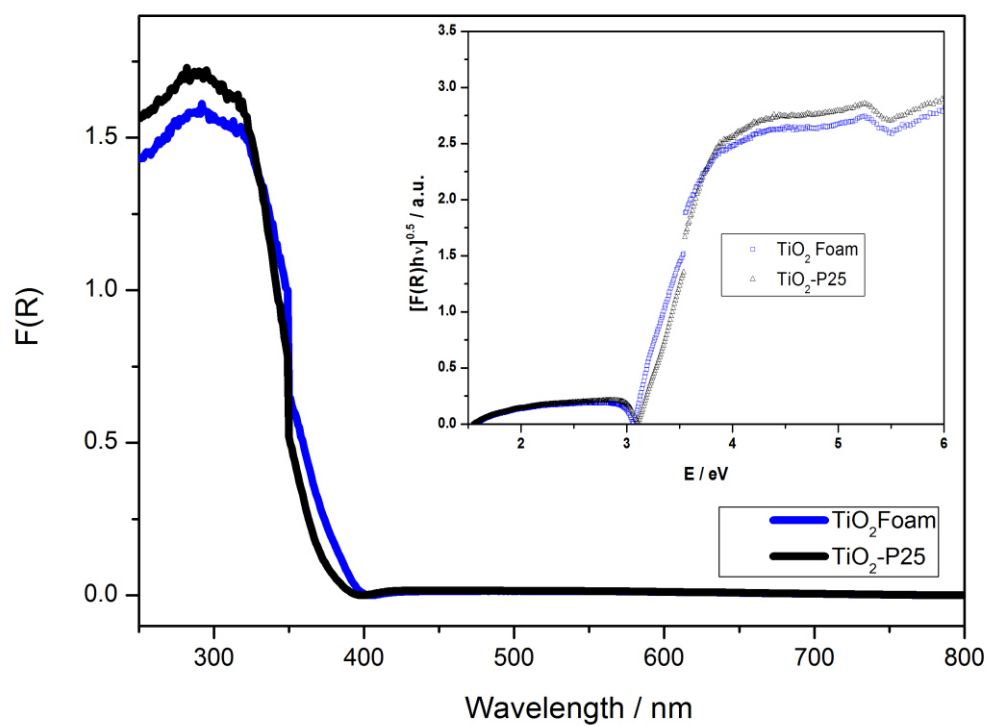

Fig. S2. Comparison between the diffuse reflectance spectra of  $\text{TiO}_2\text{-P25}$  and prepared  $\text{TiO}_2$  Foam, inset shows the modified Kubelka-Munk function versus the photon energy of these two samples.

### Supplementary 3.

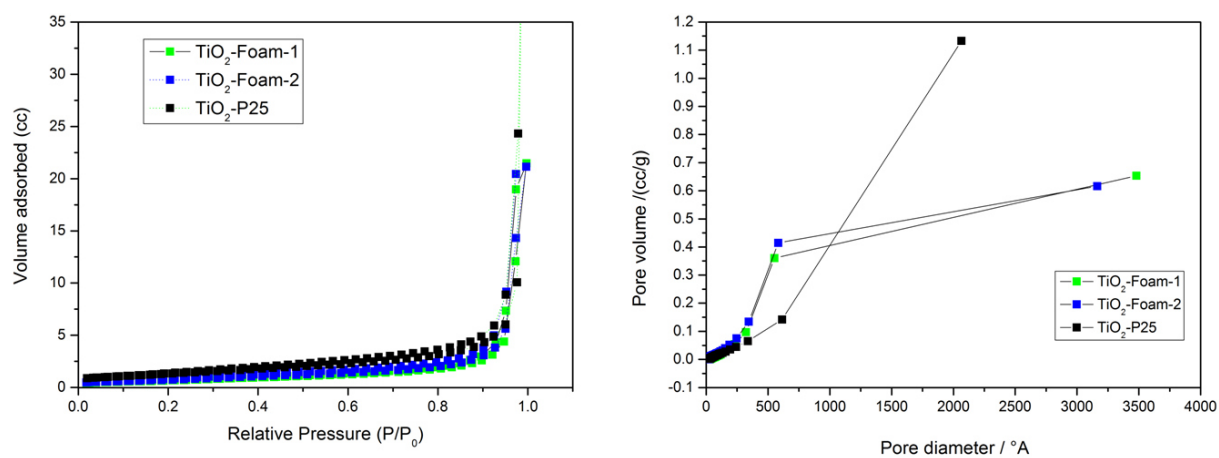

Fig. S3. Left: Nitrogen adsorption-desorption isotherm of TiO<sub>2</sub>-Foam-1 (Hexylic acid as amphiphilic molecule), TiO<sub>2</sub>-Foam-2 (Hexylamine as amphiphilic molecule), and TiO<sub>2</sub>-P25. Right: The BJH graphs indicated corresponding pore size distributions of samples.

#### Supplementary 4.

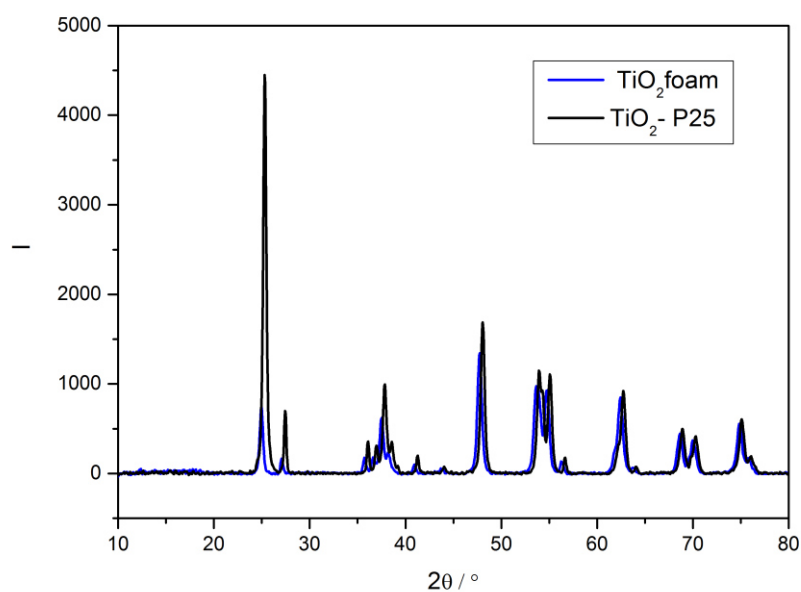

Fig .S4. Comparison between the XRD pattern of TiO<sub>2</sub>-Foam (with Hexylic acid) and commercial used TiO<sub>2</sub> (Evonik AEROXIDE® P25).

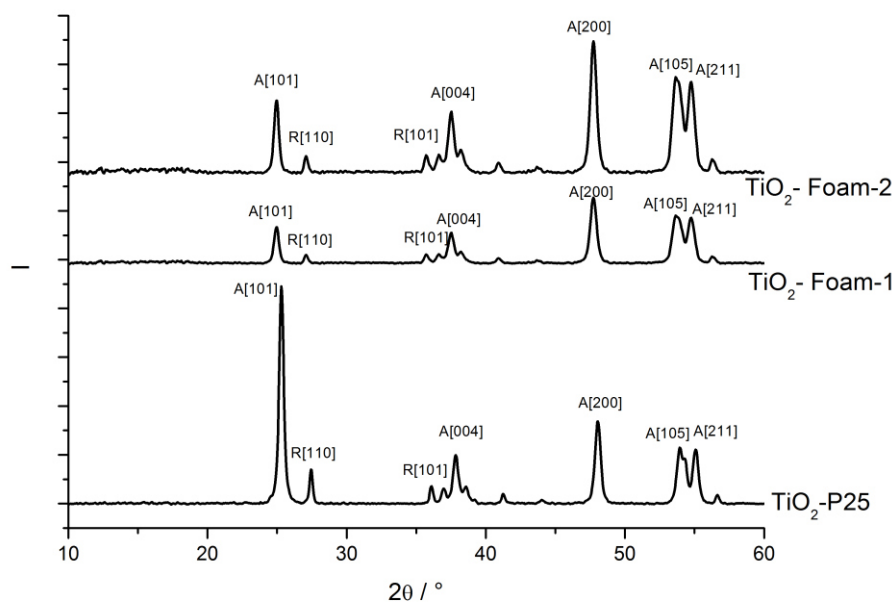

Fig. S5. XRD patterns of TiO<sub>2</sub>-P25, TiO<sub>2</sub>-Foam-1, and TiO<sub>2</sub>-Foam-2, the respective reflection peaks of anatase (A) and rutile (R) phases are labeled with their Miller indices.
